# Supplementary material for: A myristoyl switch at the plasma membrane triggers cleavage and oligomerization of Mason-Pfizer monkey virus matrix protein
Source: eLife. 2024 Mar 22;13:e93489. doi: 10.7554/eLife.93489 (PMC11014724; doi:10.7554/eLife.93489)
Supplement: Figure 3—source data 1. [file elife-93489-fig3-data1.xlsx]

## Sheet: Figure 3 – figure supplement 4
Figure 3 – source data 1 Comparison of HDX of (myr+)MAPP and (myr-)MAPP - data related to Figure 3B. The significant HDX increase in WT (myr-)MAPP is highlighted in bold italics. The significant HDX decrease in WT (myr-)MAPP (increase in protection) is highlighted in bold. The peptide regions with no significant HDX differences observed in particular labelling time point are not highlighted.
peptide sequence	position in protein	Time (s)
		2	5	10	20	120
LSQHERYVEQL	5-15	-0.241	-0.333	-0.326	-0.450	-0.834
HERYVEQL	8-15	-0.092	-0.134	-0.232	-0.354	-0.813
KQALKTRGVKVKYADL	16-31	-2.394	-2.189	-1.952	-1.817	-1.419
QALKTRGVKVKYADLLK	17-33	-2.398	-2.194	-2.027	-1.906	-1.555
KTRGVKVKYADL	20-31	-1.965	-1.815	-1.602	-1.481	-1041
LKFFDF	32-37	0.015	-0.024	-0.001	-0.012	-0.148
VKDTCPWFPQEGTID	38-52	0.073	-0.124	-0.148	-0.304	-0.538
YNTFGPEKVPVTA	67-79	-1.313	-1.563	-1.876	-2.200	-2.180
FSYWNL	80-85	-0.161	-0.317	-0.434	-0.563	-0.856
LIDKKEVNPQVM	89-100	0.484	0.214	-0.063	-0.218	-0.280
LIDKKEVNPQVMA	89-101	0.380	0.216	-0.085	-0.228	-0.302
LIDKKEVNPQVMAA	89-102	0.816	0.355	-0.021	-0.241	-0.368
IDKKEVNPQVM	90-100	0.550	0.285	-0.006	-0.137	-0.196
IDKKEVNPQVMAA	90-102	0.867	0.365	-0.035	-0.189	-0.281
AAVAQT	101-106	0.840	0.558	0.271	0.053	-0.121
AAVAQTEE	101-108	1.206	0.779	0.378	0.107	-0.075
AAVAQTEEIL	101-110	1.366	0.992	0.519	0.052	-0.295
AVAQTEEIL	102-110	0.464	0.335	0.121	-0.053	-0.225
VAQTEE	103-108	0.659	0.300	0.060	-0.057	-0.144
VAQTEEIL	103-110	0.844	0.614	0.333	0.051	-0.194
LKSNSQTDLEHHHHHH	110-125	0.055	-0.022	-0.087	-0.175	-0.302
