# Supplementary material for: A myristoyl switch at the plasma membrane triggers cleavage and oligomerization of Mason-Pfizer monkey virus matrix protein
Source: eLife. 2024 Mar 22;13:e93489. doi: 10.7554/eLife.93489 (PMC11014724; doi:10.7554/eLife.93489)
Supplement: Figure 3—source data 2. [file elife-93489-fig3-data2.xlsx]

## Sheet: Figure 3 – figure supplement 5
Figure 3 – source data 2 Comparison of HDX of (myr+)MAPP and I51A (myr+)MAPP - data related to Figure 3C. The significant HDX increase in I51A (myr+)MAPP is highlighted in bold italics. The significant HDX decrease in I51A (myr+)MAPP (increase in protection) is highlighted in bold. The peptide regions with no significant HDX differences observed in particular labelling time point are not highligh…
peptide sequence	position in protein	Time (s)
		2	5	10	20	120
LSQHERYVEQL	5-15	-0.194	-0.169	-0.133	-0.312	-0.525
HERYVEQL	8-15	0.047	0.035	-0.009	-0.143	-0.346
KQALKTRGVKVKYADL	16-31	-2.380	-2.260	-2.206	-2.112	-1.896
QALKTRGVKVKYADLLK	17-33	-2.497	-2.359	-2.420	-2.337	-2.106
KTRGVKVKYADL	20-31	-2.471	-2.205	-2.163	-2.041	-1.855
LKFFDF	32-37	0.059	0.045	0.053	0.035	0.039
VKDTCPWFPQEGTID	38-52	0.755	0.525	0.356	0.290	0.314
YNTFGPEKVPVTA	67-79	0.173	0.125	-0.078	-0.337	-0.837
FSYWNL	80-85	0.354	0.320	0.335	0.313	0.217
LIDKKEVNPQVM	89-100	0.679	0.357	-0.026	-0.142	-0.162
LIDKKEVNPQVMA	89-101	0.561	0.576	-0.062	-0.240	-0.185
LIDKKEVNPQVMAA	89-102	0.962	0.456	0.020	-0.181	-0.249
IDKKEVNPQVM	90-100	0.470	0.299	-0.107	-0.239	-0.173
IDKKEVNPQVMAA	90-102	0.974	0.257	-0.158	-0.328	-0.367
AAVAQT	101-106	0.995	0.603	0.233	0.033	-0.114
AAVAQTEE	101-108	1.500	0.926	0.476	0.218	0.097
AAVAQTEEIL	101-110	1.690	1.179	0.595	0.149	-0.144
AVAQTEEIL	102-110	1.124	0.859	0.596	0.393	0.205
VAQTEE	103-108	0.800	0.391	0.132	0.060	-0.002
VAQTEEIL	103-110	1.189	0.857	0.521	0.249	0.042
LKSNSQTDLEHHHHHH	110-125	0.766	0.663	0.459	0.372	0.333
