# Supplementary material for: A myristoyl switch at the plasma membrane triggers cleavage and oligomerization of Mason-Pfizer monkey virus matrix protein
Source: eLife. 2024 Mar 22;13:e93489. doi: 10.7554/eLife.93489 (PMC11014724; doi:10.7554/eLife.93489)
Supplement: Figure 3—source data 3. [file elife-93489-fig3-data3.xlsx]

## Sheet: Figure 3 – figure supplement 6
Figure 3 – source data 3 Comparison of HDX of (myr+)MAPP and A79V (myr+)MAPP - data related to Figure 3D. No significant HDX increase was observed in A79V (myr+)MAPP. The significant HDX decrease in A79V (myr+)MAPP (increase in protection) is highlighted in bold. The peptide regions with no significant HDX differences observed in particular labelling time point are not highlighted.
peptide sequence	position in protein	Time (s)
		2	5	10	20	120
LSQHERYVEQL	5-15	-0.003	-0.011	0.001	-0.068	-0.164
HERYVEQL	8-15	0.000	-0.013	-0.043	-0.087	-0.202
KQALKTRGVKVKYADL	16-31	0.112	0.080	0.123	0.091	-0.061
QALKTRGVKVKYADLLK	17-33	0.167	0.101	0.080	0.049	-0.096
KTRGVKVKYADL	20-31	0.057	-0.015	0.037	0.040	-0.145
LKFFDF	32-37	0.012	-0.024	-0.011	-0.036	-0.102
VKDTCPWFPQEGTID	38-52	-0.879	-0.775	-0.642	-0.449	-0.461
YNTFGPEKVPVTA	67-79	-0.182	-0.174	-0.117	-0.103	-0.161
FSYWNL	80-85	-0.187	-0.329	-0.400	-0.393	-0.268
LIDKKEVNPQVM	89-100	-0.412	-0.341	-0.209	-0.059	-0.004
LIDKKEVNPQVMA	89-101	-0.718	-0.503	-0.274	-0.099	-0.027
LIDKKEVNPQVMAA	89-102	-0.625	-0.468	-0.212	-0.077	-0.027
IDKKEVNPQVM	90-100	-0.354	-0.304	-0.181	-0.029	0.001
IDKKEVNPQVMAA	90-102	-0.612	-0.509	-0.213	-0.015	-0.029
AAVAQT	101-106	-0.558	-0.434	-0.237	-0.083	0.044
AAVAQTEE	101-108	-0.668	-0.526	-0.295	-0.060	0.073
AAVAQTEEIL	101-110	-0.820	-0.779	-0.605	-0.355	0.024
AVAQTEEIL	102-110	-0.877	-0.706	-0.465	-0.227	0.027
VAQTEE	103-108	-0.440	-0.282	-0.103	0.037	0.056
VAQTEEIL	103-110	-0.476	-0.399	-0.287	-0.148	0.085
LKSNSQTDLEHHHHHH	110-125	-0.063	0.106	0.135	0.122	0.104
