# Supplementary material for: A myristoyl switch at the plasma membrane triggers cleavage and oligomerization of Mason-Pfizer monkey virus matrix protein
Source: eLife journal article supplement (doi:10.7554/elife.93489), 2024-03-22
Supplement: supp [file elife-93489-supp-v1.zip]

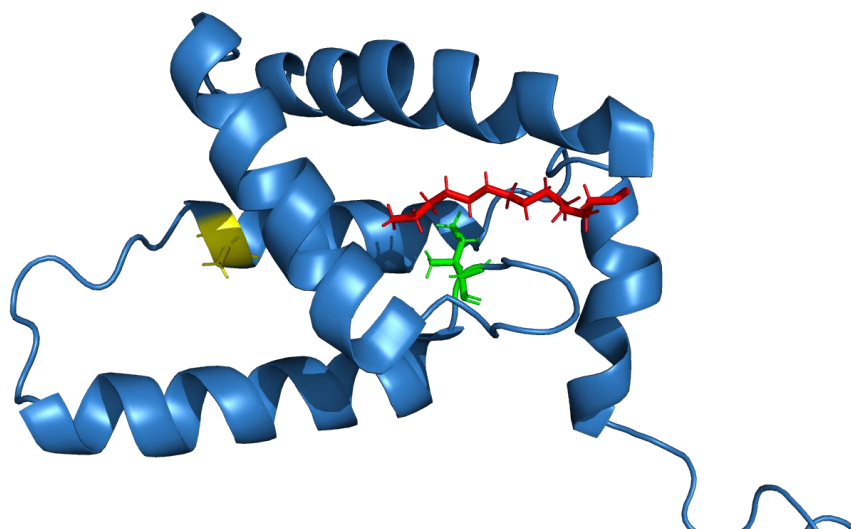

**Figure 1- figure supplement 1 Structure of WT (myr+)MAPP indicating positions of the mutated residues**

The positions of mutated residues are indicated in previously published structure (Prchal et al., 2012): I51 (green) and A79 (yellow). Myristoyl is shown in red.
