# Supplementary material for: A myristoyl switch at the plasma membrane triggers cleavage and oligomerization of Mason-Pfizer monkey virus matrix protein
Source: eLife journal article supplement (doi:10.7554/elife.93489), 2024-03-22
Supplement: supp [file elife-93489-supp-v1.zip]

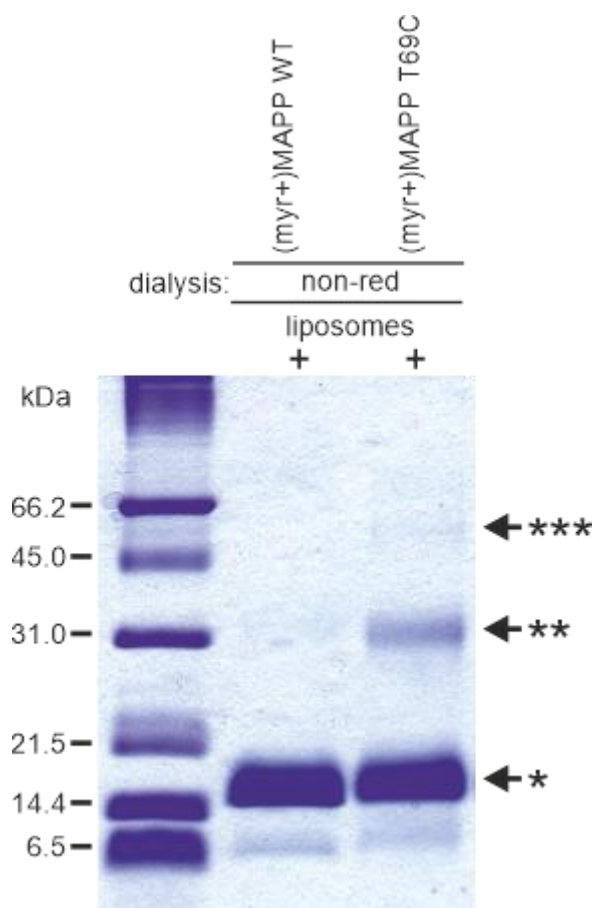

**Figure 2 - figure supplement 1 Oligomerization of (myr-)MAPP T69C.** SDS-PAGE gel showing monomer of (myr+)MAPP WT and oligomers of (myr+)MAPP T69C formed upon the interaction with liposomes, stabilized by disulfide bridges under non-reducing conditions . non-red – non-reducing conditions; \* monomer, \*\* dimer, \*\*\* trimer. Source data - **Figure 2 – figure supplement 1 - source data.**
