# Supplementary material for: A myristoyl switch at the plasma membrane triggers cleavage and oligomerization of Mason-Pfizer monkey virus matrix protein
Source: eLife journal article supplement (doi:10.7554/elife.93489), 2024-03-22
Supplement: supp [file elife-93489-supp-v1.zip]

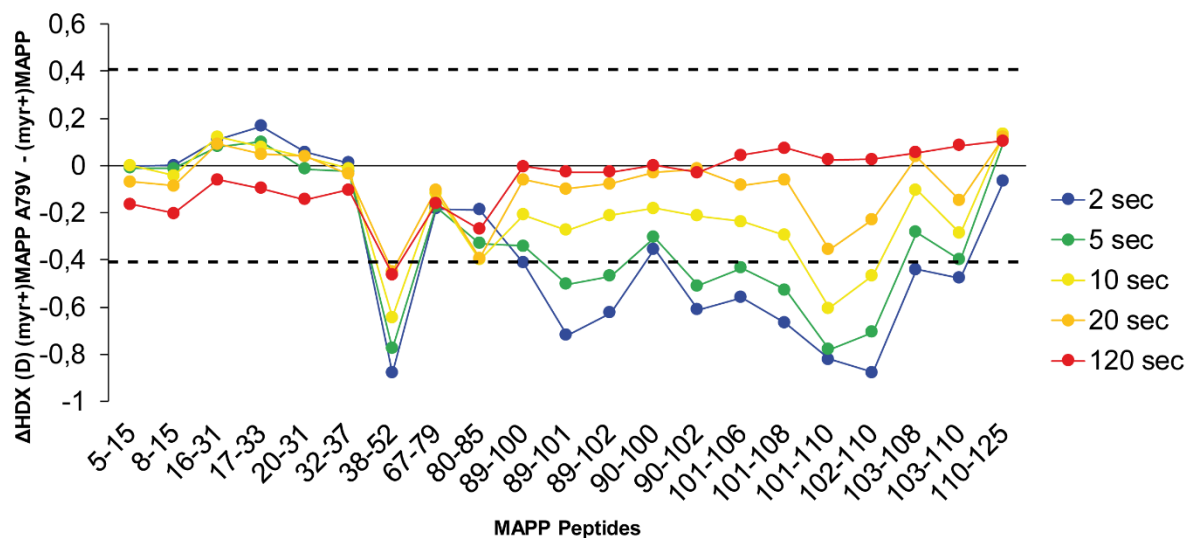

**Figure 3 – figure supplement 3 Comparison of HDX of (myr+)MAPP and A79V (myr+)MAPP.**

The butterfly plot shows the HDX differences between WT (myr+)MAPP and A79V (myr+)MAPP over the time (see also **Figure 3 – source data 3**). Peptides with significant differences in HDX are arranged according to their positions in MAPP. Confidence threshold ( $CI_{98\%}$ ) is displayed as a dotted black line. The value of confidence threshold was calculated as  $\pm 0.410$  Da.
