# Supplementary material for: A myristoyl switch at the plasma membrane triggers cleavage and oligomerization of Mason-Pfizer monkey virus matrix protein
Source: eLife journal article supplement (doi:10.7554/elife.93489), 2024-03-22
Supplement: supp [file elife-93489-supp-v1.zip]

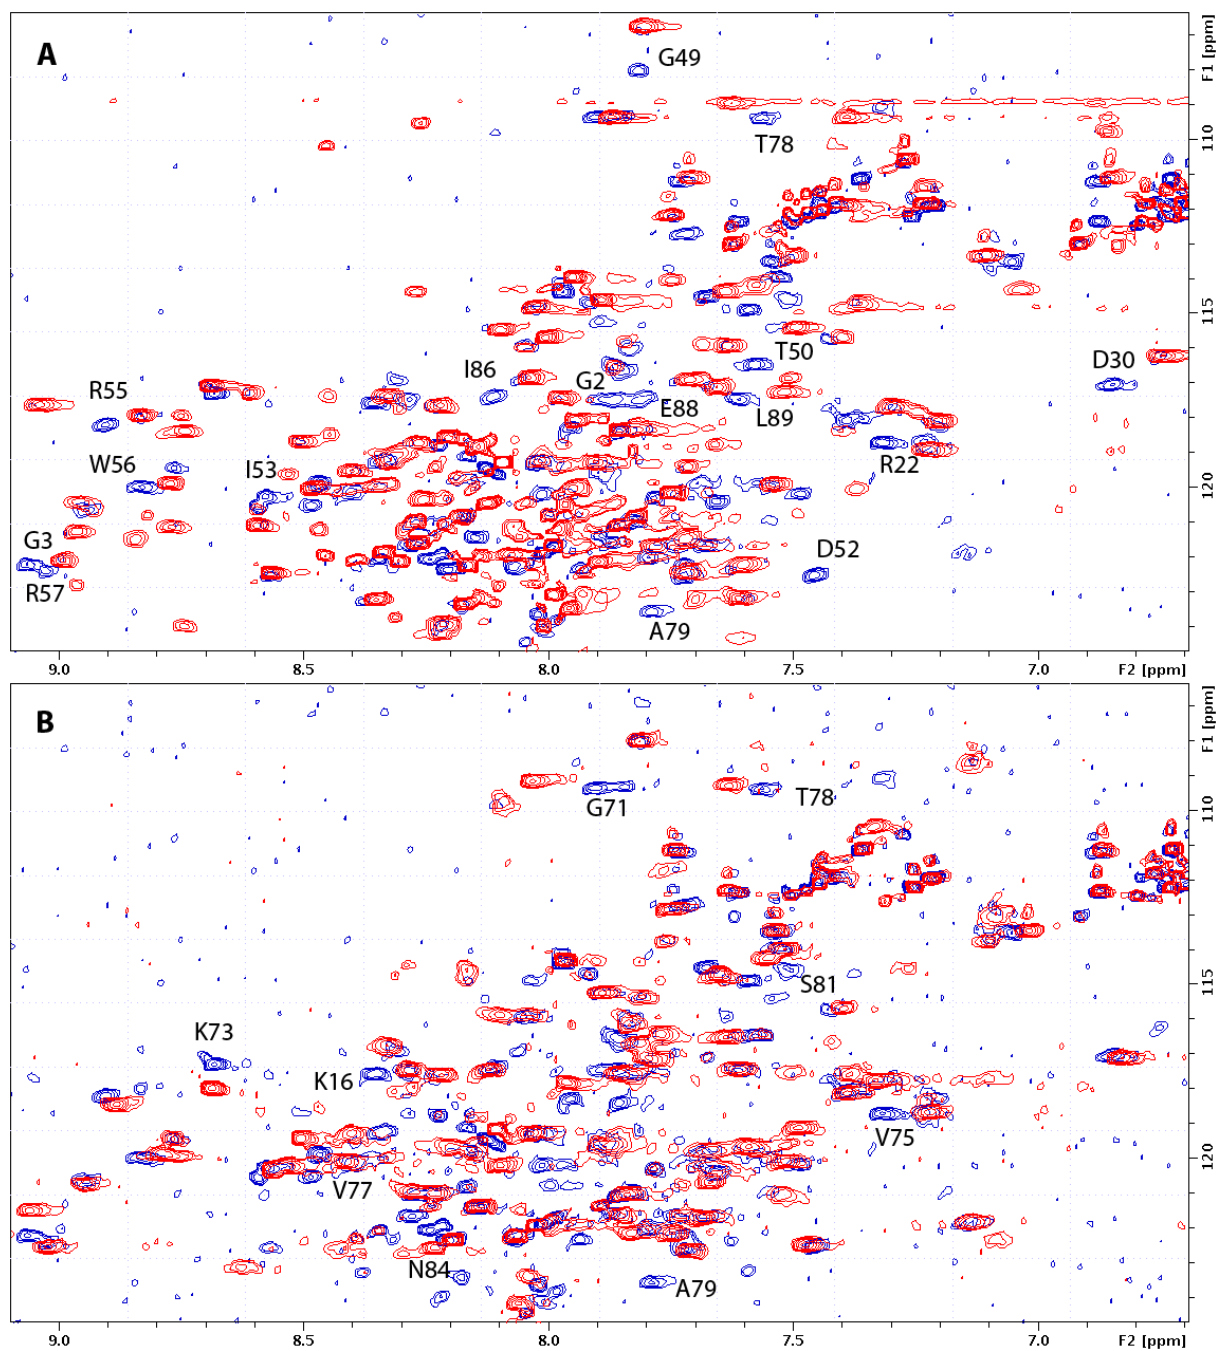

**Figure 1 - figure supplement 1 Comparison of (myr+)MAPP wt and mutants HN-HSQC spectra.**

HN-HSQC spectra of wt (myr+)MAPP (blue) overlaid with the same spectra of I51A (red, panel A) and A79V (red, panel B) mutants. Signals of wt HN groups that are not overlapped by signals of mutant are assigned.
