# Supplementary material for: A myristoyl switch at the plasma membrane triggers cleavage and oligomerization of Mason-Pfizer monkey virus matrix protein
Source: eLife. 2024 Mar 22;13:e93489. doi: 10.7554/eLife.93489 (PMC11014724; doi:10.7554/eLife.93489)
Supplement: Supplementary file 1. [file elife-93489-supp1.xlsx]

## Sheet: predAdjCS
Comparison of observed and calculated backbone atoms chemical shifts for (myr+)MAPP and (myr-)MAPP.
Chemical shifts were calculated in TALOS+ program for random coil secondary structure. Lower chemical shifts indicate the presence of α-helical secondary structure.
residue and atom name			(myr+)MAPP observed chemical shift	(myr+)MAPP calculated chemical shift	difference	(myr-)MAPP observed chemical shift	(myr-)MAPP calculated chemical shift	difference
2	G	N	108.495	110.133	-1.638
2	G	HA	7.259	3.960	3.463
2	G	CA	48.529	45.100	3.429
3	Q	N	122.212	120.867	1.345
3	Q	HA	3.896	4.340	-0.280	4.306	4.340	0.080
3	Q	C				175.705	176.000	-0.295
3	Q	CA	58.794	55.803	2.991	56.001	55.803	0.198
3	Q	CB				29.457	28.738	0.719
3	Q	H	9.311	8.270	1.041
4	E	N	119.521	121.774	-2.253	122.913	121.774	1.139
4	E	HA				4.255	4.350	0.019
4	E	C				176.365	176.600	-0.235
4	E	CA	59.561	56.400	3.161	56.448	56.400	0.048
4	E	CB	28.876	29.700	-0.824	30.058	29.700	0.358
4	E	H	8.488	8.360	0.128	8.604	8.360	0.244
5	L	N	114.833	123.503	-8.670	123.842	123.503	0.339
5	L	HA	3.721	4.340	-0.455	4.342	4.340	0.116
5	L	C				177.755	176.870	0.885
5	L	CA	57.407	54.840	2.567	55.221	54.840	0.381
5	L	CB	40.844	42.059	-1.215	43.013	42.059	0.954
5	L	H	8.211	8.230	-0.019	8.264	8.230	0.034
6	S	N	109.747	117.200	-7.453	118.738	117.200	1.538
6	S	HA	4.126	4.470	-0.180	4.435	4.470	0.079
6	S	C				174.943	174.600	0.343
6	S	CA	60.405	58.200	2.205	59.146	58.200	0.946
6	S	CB	63.323	63.200	0.123	64.733	63.200	1.533
6	S	H	8.243	8.310	-0.067	8.878	8.310	0.568
7	Q	N				121.527	122.394	-0.867
7	Q	CA				59.785	55.803	3.982
7	Q	H				8.803	8.270	0.533
9	E	HA	3.975	4.256	-0.117
9	E	CA	60.249	56.400	3.849
9	E	CB	29.020	29.700	-0.680
10	R	N	118.809	122.300	-3.491
10	R	HA	4.117	4.340	-0.059
10	R	CA	58.633	56.100	2.533
10	R	CB	29.004	30.300	-1.296
10	R	H	8.917	8.270	0.647
11	Y	N	121.229	121.746	-0.517
11	Y	HA	4.199	4.550	-0.187
11	Y	CA	61.331	58.100	3.231
11	Y	CB	34.123	38.460	-4.337
11	Y	H	7.563	8.280	-0.717
12	V	N	119.240	121.664	-2.424
12	V	HA	3.130	4.120	-0.826	4.011	4.120	0.005
12	V	CA	66.974	62.300	4.674	67.100	62.300	4.800
12	V	CB	30.918	31.823	-0.905	30.900	31.823	-0.923
12	V	H	8.083	8.190	-0.107
14	Q	HA	3.653	4.340	-0.523
14	Q	CA	59.978	55.803	4.175
14	Q	CB	29.681	28.738	0.943
15	L	HA	3.865	4.340	-0.311
15	L	CA	58.177	54.840	3.337
15	L	CB	40.677	42.059	-1.382
16	K	HA	3.737	4.320	-0.419	4.072	4.320	-0.134
16	K	C				176.425	176.600	-0.175
16	K	CA	60.405	56.287	4.118	56.701	56.287	0.414
16	K	CB	32.057	32.500	-0.443	32.534	32.500	0.034
17	Q	N	117.499	121.345	-3.846	118.883	121.345	-2.462
17	Q	C				173.986	176.000	-2.014
17	Q	HA	3.864	4.340	-0.312
17	Q	CA	58.307	55.803	2.504	55.927	55.803	0.124
17	Q	CB	27.788	28.738	-0.950	29.082	28.738	0.344
17	Q	H	7.862	8.270	-0.408	8.084	8.270	-0.186
18	A	N				125.220	124.394	0.826
18	A	HA	3.792	4.320	-0.364
18	A	CA	54.795	52.037	2.758	52.850	52.037	0.813
18	A	CB	17.651	19.000	-1.349	19.015	19.000	0.015
18	A	H				8.076	8.150	-0.074
19	L	N	117.272	121.023	-3.751
19	L	HA	3.783	4.340	-0.393	3.869	4.340	-0.357
19	L	CA	57.725	54.840	2.885	57.590	54.840	2.750
19	L	CB	40.703	42.059	-1.356	42.043	42.059	-0.016
19	L	H	8.180	8.230	-0.050
20	K	N	117.988	121.900	-3.912
20	K	CA	60.439	56.287	4.152
20	K	H	8.342	8.250	0.092
21	T	N	116.346	116.099	0.247
21	T	HA	4.128	4.350	-0.058	4.042	4.350	-0.194
21	T	C				175.456	174.700	0.756
21	T	CA	64.644	62.100	2.544	65.673	62.100	3.573
21	T	CB	69.086	68.868	0.218	69.106	68.868	0.238
21	T	H	7.905	8.240	-0.335
22	R	N	118.734	123.700	-4.966	119.348	123.700	-4.352
22	R	HA	4.397	4.340	0.221	4.332	4.340	0.106
22	R	C				175.975	176.691	-0.716
22	R	CA	54.157	56.100	-1.943	55.390	56.100	-0.710
22	R	CB	29.383	30.300	-0.917	29.939	30.300	-0.361
22	R	H	7.307	8.270	-0.963	7.279	8.270	-0.991
23	G	N	108.423	110.246	-1.823	107.401	110.246	-2.845
23	G	HA	3.893	3.960	0.097	3.709	3.960	-0.137
23	G	C				173.933	174.900	-0.967
23	G	CA	45.953	45.100	0.853	45.486	45.100	0.386
23	G	H	7.895	8.290	-0.395	7.887	8.290	-0.403
24	V	N	117.356	120.981	-3.625	121.885	120.981	0.904
24	V	HA	4.045	4.120	0.089	3.985	4.120	-0.021
24	V	C				174.734	176.094	-1.360
24	V	CA	61.635	62.300	-0.665	61.794	62.300	-0.506
24	V	CB	32.589	31.823	0.766	32.666	31.823	0.843
24	V	H	7.440	8.190	-0.750	7.784	8.190	-0.406
25	K	N	127.397	124.225	3.172	128.653	124.225	4.428
25	K	HA	4.332	4.320	0.176	4.247	4.320	0.041
25	K	CA	55.811	56.287	-0.476	55.897	56.287	-0.390
25	K	CB	32.269	32.500	-0.231	32.239	32.500	-0.261
25	K	H	8.662	8.250	0.412	8.594	8.250	0.344
26	V	N	120.766	121.459	-0.693	121.530	121.459	0.071
26	V	HA	4.140	4.120	0.184	4.418	4.120	0.412
26	V	C				174.462	176.094	-1.632
26	V	CA	60.322	62.300	-1.978	59.556	62.300	-2.744
26	V	CB	33.742	31.823	1.919	30.384	31.823	-1.439
26	V	H	7.545	8.190	-0.645	7.747	8.190	-0.443
27	K	N	125.730	124.225	1.505	124.400	124.225	0.175
27	K	CA	55.211	56.287	-1.076
27	K	CB	31.629	32.500	-0.871
27	K	H	8.605	8.250	0.355	8.794	8.250	0.544
28	Y	C				176.809	175.900	0.909
28	Y	CA				62.677	58.100	4.577
28	Y	CB				38.448	38.460	-0.012
29	A	N				117.847	124.570	-6.723
29	A	HA	3.713	4.320	-0.443	3.829	4.320	-0.377
29	A	C				180.354	177.261	3.093
29	A	CA	54.910	52.037	2.873	55.218	52.037	3.181
29	A	CB	18.082	19.000	-0.918	18.667	19.000	-0.333
29	A	H				9.069	8.150	0.919
30	D	N	117.146	120.200	-3.054	116.269	120.200	-3.931
30	D	HA	4.374	4.640	-0.102
30	D	CA	56.459	54.000	2.459	57.132	54.000	3.132
30	D	CB	39.962	40.800	-0.838
30	D	H	6.908	8.370	-1.462	6.813	8.370	-1.557
31	L	N	123.116	122.398	0.718	123.262	122.398	0.864
31	L	HA	3.493	4.340	-0.683
31	L	CA	56.834	54.840	1.994
31	L	CB	40.888	42.059	-1.171
31	L	H	7.539	8.230	-0.691	7.777	8.230	-0.453
32	L	HA	3.612	4.340	-0.564	4.161	4.340	-0.065
32	L	CA	58.117	54.840	3.277	55.488	54.840	0.648
32	L	CB	40.614	42.059	-1.445	42.234	42.059	0.175
33	K	N	118.070	121.900	-3.830
33	K	HA	4.215	4.320	0.059
33	K	CA	59.090	56.287	2.803
33	K	CB	31.714	32.500	-0.786
33	K	H	7.182	8.250	-1.068
34	F	N	122.984	121.495	1.489
34	F	CA	60.402	58.000	2.402
34	F	H	7.755	8.300	-0.545
36	D	CA	58.278	54.000	4.278
36	D	CB	39.578	40.800	-1.222
37	F	N	122.878	121.125	1.753
37	F	HA				4.250	4.527	-0.163
37	F	C				176.293	175.800	0.493
37	F	CA	61.416	58.000	3.416	56.629	58.000	-1.371
37	F	CB	38.369	39.000	-0.631	40.870	39.000	1.870
37	F	H	7.862	8.300	-0.438
38	V	N	122.319	121.165	1.154	121.342	121.165	0.177
38	V	HA	3.109	4.120	-0.847	4.256	4.120	0.250
38	V	C				178.569	176.094	2.475
38	V	CA	67.166	62.300	4.866	64.026	62.300	1.726
38	V	CB	30.635	31.823	-1.188	32.164	31.823	0.341
38	V	H	8.445	8.190	0.255	8.101	8.190	-0.089
39	K	N	118.838	124.225	-5.387	117.294	124.225	-6.931
39	K	HA	3.467	4.320	-0.689
39	K	C				177.565	176.277	1.288
39	K	CA	59.530	56.287	3.243	58.880	56.287	2.593
39	K	CB	31.628	32.500	-0.872	31.685	32.500	-0.815
39	K	H	7.579	8.250	-0.671	8.721	8.250	0.471
40	D	N	116.210	121.945	-5.735	117.018	121.945	-4.927
40	D	HA	4.210	4.640	-0.266
40	D	C				178.031	176.300	1.731
40	D	CA	56.580	54.000	2.580	56.913	54.000	2.913
40	D	CB	40.977	40.800	0.177	41.256	40.800	0.456
40	D	H	8.052	8.370	-0.318	7.597	8.370	-0.773
41	T	N				109.517	115.329	-5.812
41	T	CA				64.165	62.100	2.065
41	T	H				7.477	8.240	-0.763
42	C	N	117.931	122.500	-4.569
42	C	CA	55.865	59.018	-3.153
42	C	CB	28.500	27.740	0.760
42	C	H	7.196	8.230	-1.034
43	P	HA	4.321	4.420	0.065
43	P	CA	65.206	63.100	2.106
43	P	CB	30.811	31.700	-0.889
44	W	N	113.815	121.900	-8.085
44	W	HA	4.402	4.660	-0.094
44	W	CA	55.409	57.345	-1.936
44	W	CB	27.771	29.460	-1.689
44	W	H	6.634	8.180	-1.546
45	F	N	123.017	121.590	1.427
45	F	HA	4.046	4.527	-0.317
45	F	CA	62.991	58.000	4.991
45	F	CB	35.109	39.000	-3.891
45	F	H	7.304	8.300	-0.996
46	P	HA	4.015	4.420	-0.241
46	P	CA	64.582	63.100	1.482
46	P	CB	30.254	31.700	-1.446
47	Q	N	114.408	120.400	-5.992
47	Q	HA	3.968	4.340	-0.208
47	Q	CA	58.300	55.803	2.497
47	Q	CB	28.471	28.738	-0.267
47	Q	H	6.543	8.270	-1.727
48	E	N	117.335	121.774	-4.439
48	E	HA	4.094	4.350	-0.092
48	E	C				178.081	176.991	1.090
48	E	CA	58.213	56.400	1.813
48	E	CB	28.757	29.700	-0.943
48	E	H	7.716	8.360	-0.644
49	G	N	105.477	110.600	-5.123	110.272	110.600	-0.328
49	G	HA	3.577	3.960	-0.219
49	G	CA	47.085	45.100	1.985	45.118	45.100	0.018
49	G	H	7.298	8.290	-0.992	8.475	8.290	0.185
50	T	N	114.044	115.221	-1.177
50	T	HA	4.254	4.350	0.068
50	T	CA	61.830	62.100	-0.270	61.362	62.100	-0.738
50	T	CB	70.728	68.868	1.860	70.184	68.868	1.316
50	T	H	7.599	8.240	-0.641
51	I	HA	4.135	4.170	0.129
51	I	CA	59.075	61.300	-2.225
51	I	CB	35.390	38.000	-2.610
52	D	N	121.862	124.136	-2.274
52	D	HA	4.652	4.640	0.176
52	D	CA	51.630	54.000	-2.370
52	D	CB	42.528	40.800	1.728
52	D	H	7.178	8.370	-1.192
53	I	N	119.537	121.745	-2.208	124.126	121.745	2.381
53	I	HA	4.149	4.170	0.143	4.118	4.170	0.062
53	I	CA	61.899	61.300	0.599	62.558	61.300	1.258
53	I	CB	37.883	38.000	-0.117	38.151	38.000	0.151
53	I	H	8.771	8.210	0.561	8.925	8.210	0.715
54	K	N	123.509	124.536	-1.027
54	K	HA	4.113	4.320	-0.043
54	K	CA	59.938	56.287	3.651
54	K	CB	31.604	32.500	-0.896
54	K	H	8.105	8.250	-0.145
55	R	N	120.359	121.545	-1.186
55	R	HA	4.423	4.340	0.247
55	R	CA	59.726	56.100	3.626
55	R	CB	40.726	30.300	10.426
55	R	H	9.183	8.270	0.913
56	W	N	120.804	122.746	-1.942
56	W	HA	4.753	4.660	0.257
56	W	CA	59.255	57.345	1.910
56	W	CB	29.997	29.460	0.537
56	W	H	8.927	8.180	0.747
57	R	N	122.161	122.140	0.021
57	R	HA	4.411	4.340	0.235
57	R	CA	60.260	56.100	4.160
57	R	CB	29.585	30.300	-0.715
57	R	H	9.231	8.270	0.961
58	R	N	120.673	121.946	-1.273
58	R	HA	4.183	4.340	0.007
58	R	CA	59.832	56.100	3.732
58	R	CB	29.753	30.300	-0.547
58	R	H	7.606	8.270	-0.664
59	V	N	121.835	121.360	0.475
59	V	HA	3.676	4.120	-0.280
59	V	CA	58.263	62.300	-4.037
59	V	CB	30.771	31.823	-1.052	31.296	31.823	-0.527
59	V	H	7.817	8.190	-0.373
60	G	N	106.512	112.625	-6.113	106.307	112.625	-6.318
60	G	HA	3.394	3.960	-0.402
60	G	CA	45.951	45.100	0.851	46.368	45.100	1.268
60	G	H	7.542	8.290	-0.748	7.423	8.290	-0.867
61	D	N	123.070	121.067	2.003
61	D	HA	4.261	4.640	-0.215
61	D	CA	56.907	54.000	2.907
61	D	CB	39.506	40.800	-1.294
61	D	H	8.197	8.370	-0.173
62	C	N	121.001	120.475	0.526
62	C	HA				4.158	4.460	-0.188
62	C	C				176.872	174.990	1.882
62	C	CA	62.380	59.018	3.362	57.346	59.018	-1.672
62	C	CB	26.011	27.740	-1.729	30.139	27.740	2.399
62	C	H	7.853	8.230	-0.377
63	F	N	119.147	122.380	-3.233	121.500	122.380	-0.880
63	F	HA	4.112	4.527	-0.251
63	F	CA	57.843	58.000	-0.157	61.820	58.000	3.820
63	F	CB	36.605	39.000	-2.395	38.353	39.000	-0.647
63	F	H	8.530	8.300	0.230	8.007	8.300	-0.293
64	Q	N	118.835	121.051	-2.216
64	Q	HA	3.856	4.340	-0.320
64	Q	CA	59.074	55.803	3.271
64	Q	CB	28.875	28.738	0.137
64	Q	H	8.235	8.270	-0.035
65	D	N	120.222	121.974	-1.752
65	D	HA	4.481	4.640	0.005
65	D	CA	57.301	54.000	3.301
65	D	CB	40.773	40.800	-0.027
65	D	H	8.257	8.370	-0.113
66	Y	N				121.740	121.475	0.265
66	Y	C				178.247	175.567	2.680
66	Y	HA	4.596	4.550	0.210
66	Y	CA	60.361	58.100	2.261	62.481	58.100	4.381
66	Y	CB	37.953	38.460	-0.507	38.782	38.460	0.322
66	Y	H				9.053	8.280	0.773
67	Y	N	122.725	122.050	0.675	121.695	122.050	-0.355
67	Y	C				178.366	175.900	2.466
67	Y	HA	4.044	4.550	-0.342
67	Y	CA	61.726	58.100	3.626	61.733	58.100	3.633
67	Y	CB	38.932	38.460	0.472	39.005	38.460	0.545
67	Y	H	9.084	8.280	0.804	9.030	8.280	0.750
68	N	N	118.552	120.450	-1.898	118.260	120.450	-2.190
68	N	HA	4.383	4.740	-0.193
68	N	C				176.778	175.510	1.268
68	N	CA	55.333	53.050	2.283	55.758	53.050	2.708
68	N	CB	37.782	38.487	-0.705	38.096	38.487	-0.391
68	N	H	8.798	8.380	0.418	8.736	8.380	0.356
69	T	N	114.332	115.704	-1.372	115.087	115.704	-0.617
69	T	HA	3.873	4.350	-0.313
69	T	C				175.062	174.700	0.362
69	T	CA	65.242	62.100	3.142	65.637	62.100	3.537
69	T	CB	69.357	68.868	0.489	69.573	68.868	0.705
69	T	H	7.961	8.240	-0.279	7.944	8.240	-0.296
70	F	N	118.102	123.150	-5.048	118.216	123.150	-4.934
70	F	HA	4.658	4.527	0.295	4.377	4.527	-0.036
70	F	C				176.635	176.191	0.444
70	F	CA	58.409	58.000	0.409	59.405	58.000	1.405
70	F	CB	40.742	39.000	1.742	40.429	39.000	1.429
70	F	H	8.588	8.300	0.288	8.473	8.300	0.173
71	G	N	109.331	110.051	-0.720	109.311	110.051	-0.740
71	G	CA	44.684	45.100	-0.416	44.828	45.100	-0.272
71	G	H	7.899	8.290	-0.391	7.790	8.290	-0.500
72	P	HA	4.688	4.420	0.432	4.285	4.420	-0.021
72	P	C				178.515	177.300	1.215
72	P	CA	63.458	63.100	0.358	64.022	63.100	0.922
72	P	CB	31.813	31.700	0.113	31.991	31.700	0.291
73	E	N	117.410	120.800	-3.390	117.160	120.800	-3.640
73	E	HA	4.061	4.350	-0.125	4.047	4.350	-0.189
73	E	C				177.666	176.600	1.066
73	E	CA	58.570	56.400	2.170	58.656	56.400	2.256
73	E	CB	28.841	29.700	-0.859	29.159	29.700	-0.541
73	E	H	8.596	8.360	0.236	8.671	8.360	0.311
74	K	N	116.816	122.200	-5.384	116.541	122.200	-5.659
74	K	HA	4.375	4.320	0.219	4.345	4.320	0.139
74	K	C				175.553	176.600	-1.047
74	K	CA	55.263	56.287	-1.024	55.224	56.287	-1.063
74	K	CB	33.890	32.500	1.390	33.345	32.500	0.845
74	K	H	7.503	8.250	-0.747	7.481	8.250	-0.769
75	V	N	118.070	121.459	-3.389	119.032	121.459	-2.427
75	V	HA	4.422	4.120	0.466
75	V	CA	58.438	62.300	-3.862	58.947	62.300	-3.353
75	V	CB	33.767	31.823	1.944	33.542	31.823	1.719
75	V	H	7.349	8.190	-0.841	7.226	8.190	-0.964
76	P	HA	4.585	4.420	0.329	3.911	4.120	-0.095
76	P	CA	61.911	63.100	-1.189	65.444	62.300	3.144
76	P	CB	32.035	31.700	0.335	31.706	31.823	-0.117
77	V	N	119.821	120.514	-0.693
77	V	HA	3.922	4.120	-0.034
77	V	CA	65.322	62.300	3.022
77	V	CB	31.319	31.823	-0.504
77	V	H	8.606	8.190	0.416
78	T	N	109.349	118.379	-9.030
78	T	HA	3.917	4.350	-0.269	4.372	4.350	0.136
78	T	CA	62.803	62.100	0.703	62.413	62.100	0.313
78	T	CB	68.396	68.868	-0.472	68.682	68.868	-0.186
78	T	H	7.378	8.240	-0.862
79	A	N	123.663	126.020	-2.357	123.583	126.020	-2.437
79	A	HA	4.004	4.320	-0.152	4.019	4.320	-0.187
79	A	CA	55.101	52.037	3.064	55.800	52.037	3.763
79	A	CB	17.463	19.000	-1.537	17.804	19.000	-1.196
79	A	H	7.809	8.150	-0.341	7.550	8.150	-0.600
80	F	N	114.251	120.230	-5.979
80	F	HA	4.452	4.527	0.089	4.256	4.527	-0.157
80	F	C				176.879	175.800	1.079
80	F	CA	61.672	58.000	3.672	56.371	58.000	-1.629
80	F	CB	37.753	39.000	-1.247	38.187	39.000	-0.813
80	F	H	7.310	8.300	-0.990
81	S	N				117.018	116.951	0.067
81	S	CA				58.785	58.200	0.585
81	S	CB				63.957	63.200	0.757
81	S	H				8.187	8.310	-0.123
82	Y	HA	4.133	4.550	-0.253
82	Y	CA	60.016	58.100	1.916
82	Y	CB	34.066	38.460	-4.394
83	W	N	120.817	123.050	-2.233
83	W	HA	4.451	4.660	-0.045
83	W	CA	63.975	57.345	6.630
83	W	CB	28.557	29.460	-0.903
83	W	H	8.653	8.180	0.473
84	N	HA	4.235	4.740	-0.341
84	N	CA	56.683	53.050	3.633
84	N	CB	39.115	38.487	0.628
85	L	N	121.881	121.973	-0.092
85	L	HA	4.057	4.340	-0.119
85	L	CA	58.228	54.840	3.388
85	L	CB	41.592	42.059	-0.467
85	L	H	7.756	8.230	-0.474
86	I	N	116.796	122.070	-5.274
86	I	HA	3.463	4.170	-0.543	3.344	4.170	-0.712
86	I	CA	61.344	61.300	0.044	63.691	61.300	2.391
86	I	CB	34.161	38.000	-3.839	36.442	38.000	-1.558
86	I	H	7.964	8.210	-0.246
87	K	N	121.842	124.536	-2.694
87	K	HA	3.220	4.320	-0.936
87	K	CA	60.067	56.287	3.780
87	K	CB	31.005	32.500	-1.495
87	K	H	7.865	8.250	-0.385
88	E	N	116.331	121.745	-5.414
88	E	HA	3.863	4.350	-0.323
88	E	CA	58.943	56.400	2.543
88	E	CB	29.221	29.700	-0.479
88	E	H	7.681	8.360	-0.679
89	L	N	118.093	122.623	-4.530
89	L	HA	3.909	4.340	-0.267
89	L	CA	57.677	54.840	2.837
89	L	CB	41.432	42.059	-0.627
89	L	H	7.436	8.230	-0.794
90	I	HA	4.129	4.170	0.123
90	I	CA	65.082	61.300	3.782
90	I	CB	37.551	38.000	-0.449
94	E	CA	56.216	56.400	-0.184
94	E	CB	29.415	29.700	-0.285
95	V	N	121.296	121.714	-0.418
95	V	HA				4.033	4.120	0.027
95	V	CA	62.257	62.300	-0.043	62.215	62.300	-0.085
95	V	CB	32.017	31.823	0.194	32.638	31.823	0.815
95	V	H	8.003	8.190	-0.187
97	P	HA	4.318	4.420	0.062	4.303	4.420	-0.003
97	P	C				177.334	177.300	0.034
97	P	CA	65.001	63.100	1.901	64.054	63.100	0.954
97	P	CB	32.035	31.700	0.335	32.018	31.700	0.318
98	Q	N	117.733	120.400	-2.667	119.357	120.400	-1.043
98	Q	HA	3.947	4.340	-0.229	4.177	4.340	-0.049
98	Q	C				176.705	176.000	0.705
98	Q	CA	55.691	55.803	-0.112	56.707	55.803	0.904
98	Q	CB	28.378	28.738	-0.360	29.017	28.738	0.279
98	Q	H	8.375	8.270	0.105	8.303	8.270	0.033
99	V	N	121.239	121.488	-0.249	120.886	121.488	-0.602
99	V	HA	3.440	4.120	-0.516	4.039	4.120	0.033
99	V	CA	66.430	62.300	4.130	62.728	62.300	0.428
99	V	CB	31.326	31.823	-0.497	32.401	31.823	0.578
99	V	H	7.907	8.190	-0.283	7.892	8.190	-0.298
100	M	N				120.153	123.425	-3.272
100	M	HA				4.340	4.480	-0.026
100	M	C				176.261	176.300	-0.039
100	M	CA				55.866	55.300	0.566
100	M	CB				32.611	32.600	0.011
100	M	H				8.301	8.290	0.011
101	A	N				124.405	124.153	0.252
101	A	HA	4.218	4.320	0.062	4.182	4.320	-0.024
101	A	C				177.644	177.584	0.060
101	A	CA	54.670	52.037	2.633	52.989	52.037	0.952
101	A	CB	17.574	19.000	-1.426	19.037	19.000	0.037
102	A	N	119.527	122.620	-3.093	8.075	8.150	-0.075
102	A	N				122.718	122.620	0.098
102	A	HA	4.004	4.320	-0.152	4.251	4.320	0.045
102	A	C				178.129	177.584	0.545
102	A	CA	54.987	52.037	2.950	52.758	52.037	0.721
102	A	CB	17.403	19.000	-1.597	19.130	19.000	0.130
102	A	H	7.552	8.150	-0.598	8.028	8.150	-0.122
103	V	N	122.675	119.714	2.961	118.542	119.714	-1.172
103	V	HA	4.087	4.120	0.131
103	V	CA	61.850	62.300	-0.450	62.699	62.300	0.399
103	V	CB	32.576	31.823	0.753	32.556	31.823	0.733
103	V	H	8.852	8.190	0.662	7.895	8.190	-0.295
104	A	N	128.028	126.645	1.383
104	A	HA	4.288	4.320	0.132	4.268	4.320	0.062
104	A	C				177.811	177.584	0.227
104	A	CA	59.508	52.037	7.471	52.669	52.037	0.632
104	A	CB	19.021	19.000	0.021	19.124	19.000	0.124
104	A	H	8.376	8.150	0.226
105	Q	N	120.280	119.600	0.680	119.723	119.600	0.123
105	Q	HA	4.281	4.340	0.105	4.322	4.340	0.096
105	Q	C				176.367	176.000	0.367
105	Q	CA	55.656	55.803	-0.147	56.110	55.803	0.307
105	Q	CB	29.639	28.738	0.901	29.133	28.738	0.395
105	Q	H	8.375	8.270	0.105	8.265	8.270	-0.005
106	T	N				115.097	116.128	-1.031
106	T	HA	4.293	4.350	0.107	4.227	4.350	-0.009
106	T	C				174.693	174.700	-0.007
106	T	CA	61.663	62.100	-0.437	62.320	62.100	0.220
106	T	CB	69.458	68.868	0.590	69.751	68.868	0.883
106	T	H				8.046	8.240	-0.194
107	E	N	122.738	123.400	-0.662	122.671	123.400	-0.729
107	E	HA	4.241	4.350	0.055	4.163	4.350	-0.073
107	E	C				176.730	176.600	0.130
107	E	CA	56.621	56.400	0.221	57.105	56.400	0.705
107	E	CB	29.952	29.700	0.252	30.148	29.700	0.448
107	E	H	8.416	8.360	0.056	8.387	8.360	0.027
108	E	N	121.991	121.600	0.391	121.686	121.600	0.086
108	E	HA	4.184	4.350	-0.002	4.152	4.350	-0.084
108	E	C				176.865	176.600	0.265
108	E	CA	56.721	56.400	0.321	57.230	56.400	0.830
108	E	CB	29.806	29.700	0.106	30.109	29.700	0.409
108	E	H	8.331	8.360	-0.029	8.284	8.360	-0.076
109	I	N	122.201	122.370	-0.169	121.993	122.370	-0.377
109	I	HA	4.052	4.170	0.046	4.011	4.170	-0.045
109	I	C				176.593	176.117	0.476
109	I	CA	61.243	61.300	-0.057	61.652	61.300	0.352
109	I	CB	38.157	38.000	0.157	38.321	38.000	0.321
109	I	H	8.057	8.210	-0.153	8.008	8.210	-0.202
110	L	N	125.614	125.359	0.255	125.157	125.359	-0.202
110	L	HA	4.298	4.340	0.122	4.269	4.340	0.043
110	L	C				177.579	176.870	0.709
110	L	CA	55.136	54.840	0.296	55.483	54.840	0.643
110	L	CB	41.929	42.059	-0.130	42.126	42.059	0.067
110	L	H	8.192	8.230	-0.038	8.152	8.230	-0.078
111	K	N	122.146	122.380	-0.234	121.928	122.380	-0.452
111	K	HA	4.278	4.320	0.122	4.258	4.320	0.052
111	K	C				176.876	176.600	0.276
111	K	CA	56.125	56.287	-0.162	56.602	56.287	0.315
111	K	CB	32.456	32.500	-0.044	32.865	32.500	0.365
111	K	H	8.204	8.250	-0.046	8.149	8.250	-0.101
112	S	N	116.366	117.245	-0.879	116.474	117.245	-0.771
112	S	HA	4.395	4.470	0.089	4.367	4.470	0.011
112	S	C				174.613	174.600	0.013
112	S	CA	58.426	58.200	0.226	58.626	58.200	0.426
112	S	CB	63.495	63.200	0.295	63.894	63.200	0.694
112	S	H	8.218	8.310	-0.092	8.181	8.310	-0.129
113	N	N	119.794	121.774	-1.980	120.651	121.774	-1.123
113	N	HA	4.704	4.740	0.128	4.704	4.740	0.078
113	N	C				175.410	175.510	-0.100
113	N	CA	53.592	53.050	0.542	53.501	53.050	0.451
113	N	CB	38.619	38.487	0.132	38.949	38.487	0.462
113	N	H	7.948	8.380	-0.432	8.396	8.380	0.016
114	S	N	115.432	116.850	-1.418	115.932	116.850	-0.918
114	S	HA	4.382	4.470	0.076	4.375	4.470	0.019
114	S	C				174.736	174.600	0.136
114	S	CA	58.919	58.200	0.719	58.780	58.200	0.580
114	S	CB	63.494	63.200	0.294	63.880	63.200	0.680
114	S	H	7.973	8.310	-0.337	8.220	8.310	-0.090
115	Q	N	121.963	122.394	-0.431	122.085	122.394	-0.309
115	Q	HA	4.347	4.340	0.171	4.334	4.340	0.108
115	Q	C				176.383	176.000	0.383
115	Q	CA	56.036	55.803	0.233	56.350	55.803	0.547
115	Q	CB	30.006	28.738	1.268	29.236	28.738	0.498
115	Q	H	8.382	8.270	0.112	8.363	8.270	0.093
116	T	N	114.720	116.128	-1.408	114.656	116.128	-1.472
116	T	HA	4.236	4.350	0.050	4.164	4.350	-0.072
116	T	C				174.435	174.377	0.058
116	T	CA	62.226	62.100	0.126	62.408	62.100	0.308
116	T	CB	69.374	68.868	0.506	69.700	68.868	0.832
116	T	H	8.072	8.240	-0.168	8.061	8.240	-0.179
117	D	N	122.562	123.600	-1.038	122.675	123.600	-0.925
117	D	HA	4.576	4.640	0.100	4.515	4.640	-0.011
117	D	C				176.381	176.300	0.081
117	D	CA	54.237	54.000	0.237	54.721	54.000	0.721
117	D	CB	40.609	40.800	-0.191	41.038	40.800	0.238
117	D	H	8.287	8.370	-0.083	8.264	8.370	-0.106
118	L	N	122.109	122.398	-0.289	122.043	122.398	-0.355
118	L	HA	4.162	4.340	-0.014	4.157	4.340	-0.069
118	L	C				177.752	176.870	0.882
118	L	CA	55.483	54.840	0.643	55.666	54.840	0.826
118	L	CB	41.699	42.059	-0.360	42.192	42.059	0.133
118	L	H	8.089	8.230	-0.141	8.056	8.230	-0.174
119	E	N	119.517	121.700	-2.183	119.989	121.700	-1.711
119	E	HA	4.087	4.350	-0.099
119	E	CA	56.570	56.400	0.170	57.054	56.400	0.654
119	E	CB	29.486	29.700	-0.214	30.017	29.700	0.317
119	E	H	8.136	8.360	-0.224	8.148	8.360	-0.212
120	H	N	118.066	120.870	-2.804
120	H	HA	4.485	4.556	0.093
120	H	CA	55.422	56.048	-0.626
120	H	CB	28.628	29.762	-1.134
120	H	H	8.135	8.280	-0.145
121	H	N	119.323	120.270	-0.947
121	H	HA	4.242	4.462	-0.056
121	H	CA	56.732	56.048	0.684
121	H	H	8.372	8.280	0.092
122	H	N	126.032	120.270	5.762
122	H	CA	57.036	56.048	0.988
122	H	CB	29.923	29.762	0.161
122	H	H	7.900	8.280	-0.380
123	H	N	121.012	120.270	0.742
123	H	HA	4.595	4.462	0.297
123	H	CA	55.372	56.048	-0.676
123	H	CB	29.165	29.762	-0.597
123	H	H	8.595	8.280	0.315
124	H	N	120.343	120.270	0.073
124	H	CA	57.380	56.048	1.332
124	H	CB	35.491	29.762	5.729
124	H	H	8.558	8.280	0.278
125	H	N	125.371	120.270	5.101
125	H	HA	4.405	4.462	0.107
125	H	CA	56.880	56.048	0.832
125	H	CB	29.536	29.762	-0.226
125	H	H	8.069	8.280	-0.211
