# Supplementary material for: A myristoyl switch at the plasma membrane triggers cleavage and oligomerization of Mason-Pfizer monkey virus matrix protein
Source: eLife. 2024 Mar 22;13:e93489. doi: 10.7554/eLife.93489 (PMC11014724; doi:10.7554/eLife.93489)
Supplement: Supplementary file 2. [file elife-93489-supp2.xlsx]

## Sheet: List1
Estimated backbone order parameters and secondary structure for (myr+)MAPP and (myr-)MAPP.
Backbone parameters (S2) and secondary structure (SS) were calculated at TALOS + software.
Secondary structure code is L – loop; H – helix; X - cannot be calculated due to missing signals.
Residue number	Residue type	(myr+)MAPP S2	(myr+)MAPP SS	(myr-)MAPP S2	(myr-)MAPP SS
2	G	0.892	L	0.252	L
3	Q	0.897	H	0.298	L
4	E	0.905	H	0.424	L
5	L	0.910	H	0.595	L
6	S	0.912	H	0.736	L
7	Q	0.913	H	0.764	X
8	H	0.914	H		X
9	E	0.904	H		X
10	R	0.897	H	0.596	X
11	Y	0.881	H	0.596	X
12	V	0.871	H	0.596	X
13	E	0.846	H		X
14	Q	0.850	L	0.628	X
15	L	0.864	H	0.605	L
16	K	0.891	H	0.635	L
17	Q	0.900	H	0.687	L
18	A	0.902	H	0.750	H
19	L	0.903	H	0.831	H
20	K	0.894	H	0.812	H
21	T	0.844	H	0.763	L
22	R	0.760	L	0.684	L
23	G	0.649	L	0.689	L
24	V	0.628	L	0.721	L
25	K	0.632	L	0.812	L
26	V	0.698	L	0.846	L
27	K	0.702	L	0.896	H
28	Y	0.792	H	0.907	H
29	A	0.877	H	0.885	H
30	D	0.879	H	0.744	H
31	L	0.889	H	0.683	X
32	L	0.896	H	0.575	X
33	K	0.906	H		X
34	F	0.913	H		X
35	F	0.919	H	0.791	X
36	D	0.922	H	0.817	L
37	F	0.920	H	0.843	H
38	V	0.918	H	0.880	H
39	K	0.908	H	0.897	H
40	D	0.894	H	0.895	H
41	T	0.848	L	0.891	X
42	C	0.833	L		X
43	P	0.835	L		X
44	W	0.862	L		X
45	F	0.872	L		X
46	P	0.868	H	0.423	X
47	Q	0.878	H	0.477	X
48	E	0.873	H	0.484	X
49	G	0.872	H	0.518	X
50	T	0.842	L	0.498	X
51	I	0.825	L	0.603	X
52	D	0.809	L	0.603	X
53	I	0.833	H	0.603	X
54	K	0.868	H		X
55	R	0.905	H		X
56	W	0.912	H		X
57	R	0.906	H	0.505	X
58	R	0.895	H	0.572	X
59	V	0.894	H	0.572	X
60	G	0.901	H	0.740	L
61	D	0.912	H	0.842	L
62	C	0.909	H	0.842	H
63	F	0.901	H	0.832	X
64	Q	0.897	H	0.867	X
65	D	0.901	H	0.874	H
66	Y	0.896	H	0.873	H
67	Y	0.886	H	0.863	H
68	N	0.860	H	0.841	H
69	T	0.839	H	0.797	L
70	F	0.808	L	0.780	L
71	G	0.802	L	0.778	L
72	P	0.803	L	0.804	L
73	E	0.814	L	0.796	L
74	K	0.809	L	0.789	L
75	V	0.801	L	0.744	L
76	P	0.808	L	0.759	H
77	V	0.827	H	0.775	H
78	T	0.860	H	0.796	H
79	A	0.881	H	0.751	L
80	F	0.895	H	0.724	L
81	S	0.895	H	0.672	X
82	Y	0.892	H		X
83	W	0.885	H		X
84	N	0.869	H	0.711	X
85	L	0.865	H	0.711	X
86	I	0.876	H	0.711	X
87	K	0.901	H		X
88	E	0.908	H		X
89	L	0.907	H		X
90	I	0.893	H		X
91	D	0.878	H		X
92	K	0.805	L		X
93	K	0.735	L	0.456	X
94	E	0.684	L	0.456	X
95	V	0.672	L	0.473	L
96	N	0.753	L	0.432	L
97	P	0.864	H	0.443	L
98	Q	0.879	H	0.417	L
99	V	0.896	H	0.438	L
100	M	0.905	H	0.410	L
101	A	0.877	H	0.408	L
102	A	0.864	H	0.365	L
103	V	0.783	H	0.336	L
104	A	0.698	L	0.325	L
105	Q	0.519	L	0.386	L
106	T	0.453	L	0.457	L
107	E	0.399	L	0.460	L
108	E	0.383	L	0.339	L
109	I	0.309	L	0.242	L
110	L	0.275	L	0.159	L
111	K	0.280	L	0.127	L
112	S	0.331	L	0.104	L
113	N	0.358	L	0.124	L
114	S	0.366	L	0.235	L
115	Q	0.420	L	0.392	L
116	T	0.488	L	0.597	L
117	D	0.586	L	0.590	L
118	L	0.555	L	0.591	L
119	E	0.580	L	0.543	X
120	H	0.638	L		X
121	H	0.763	L		X
122	H	0.811	L		X
123	H	0.810	L		X
124	H	0.795	L		X
125	H	0.791	L		X
