# Supplementary figures and images for: A myristoyl switch at the plasma membrane triggers cleavage and oligomerization of Mason-Pfizer monkey virus matrix protein
Source: eLife journal article supplement (doi:10.7554/elife.93489), 2024-03-22

|                |   |    |   |   |   |    |   |   |   |    |
|----------------|---|----|---|---|---|----|---|---|---|----|
| M-PMV protease | - | -  | + | + | + | +  | + | + | + | +  |
| liposomes      | - | -  | - | - | - | -  | + | + | + | +  |
| time (h)       | 1 | 24 | 1 | 2 | 4 | 24 | 1 | 2 | 4 | 24 |

(myr+)MAPP A79V

→

(myr+)MA A79V

→

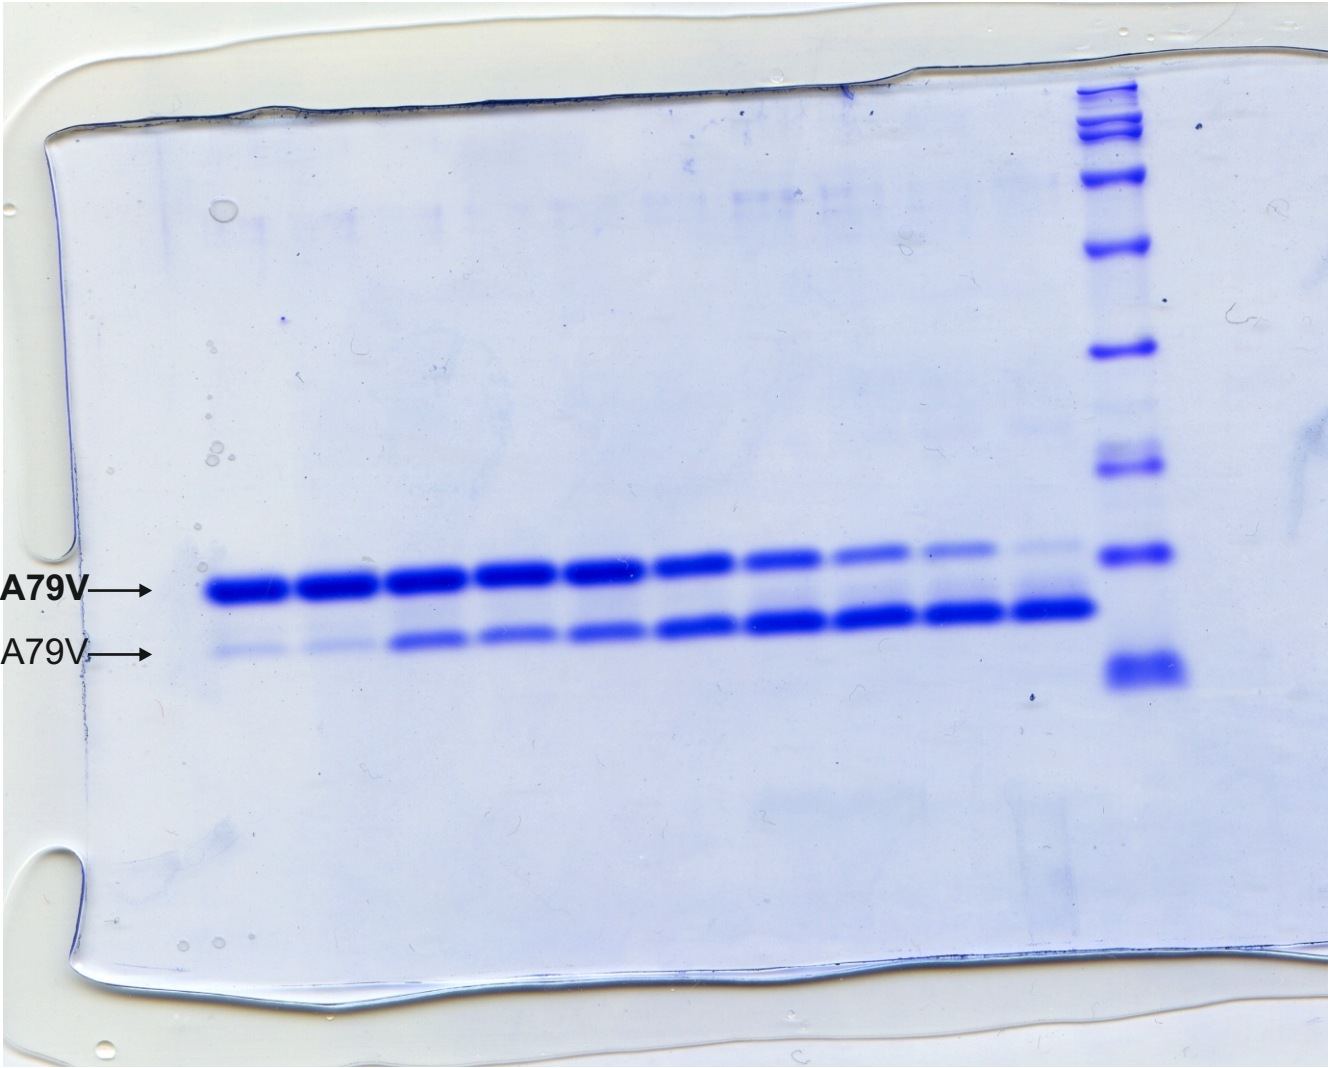

Supplement: supp [file elife-93489-supp-v1.zip]

|                |   |    |   |   |   |    |   |   |   |    |
|----------------|---|----|---|---|---|----|---|---|---|----|
| M-PMV protease | - | -  | + | + | + | +  | + | + | + | +  |
| liposomes      | - | -  | - | - | - | -  | + | + | + | +  |
| time (h)       | 1 | 24 | 1 | 2 | 4 | 24 | 1 | 2 | 4 | 24 |

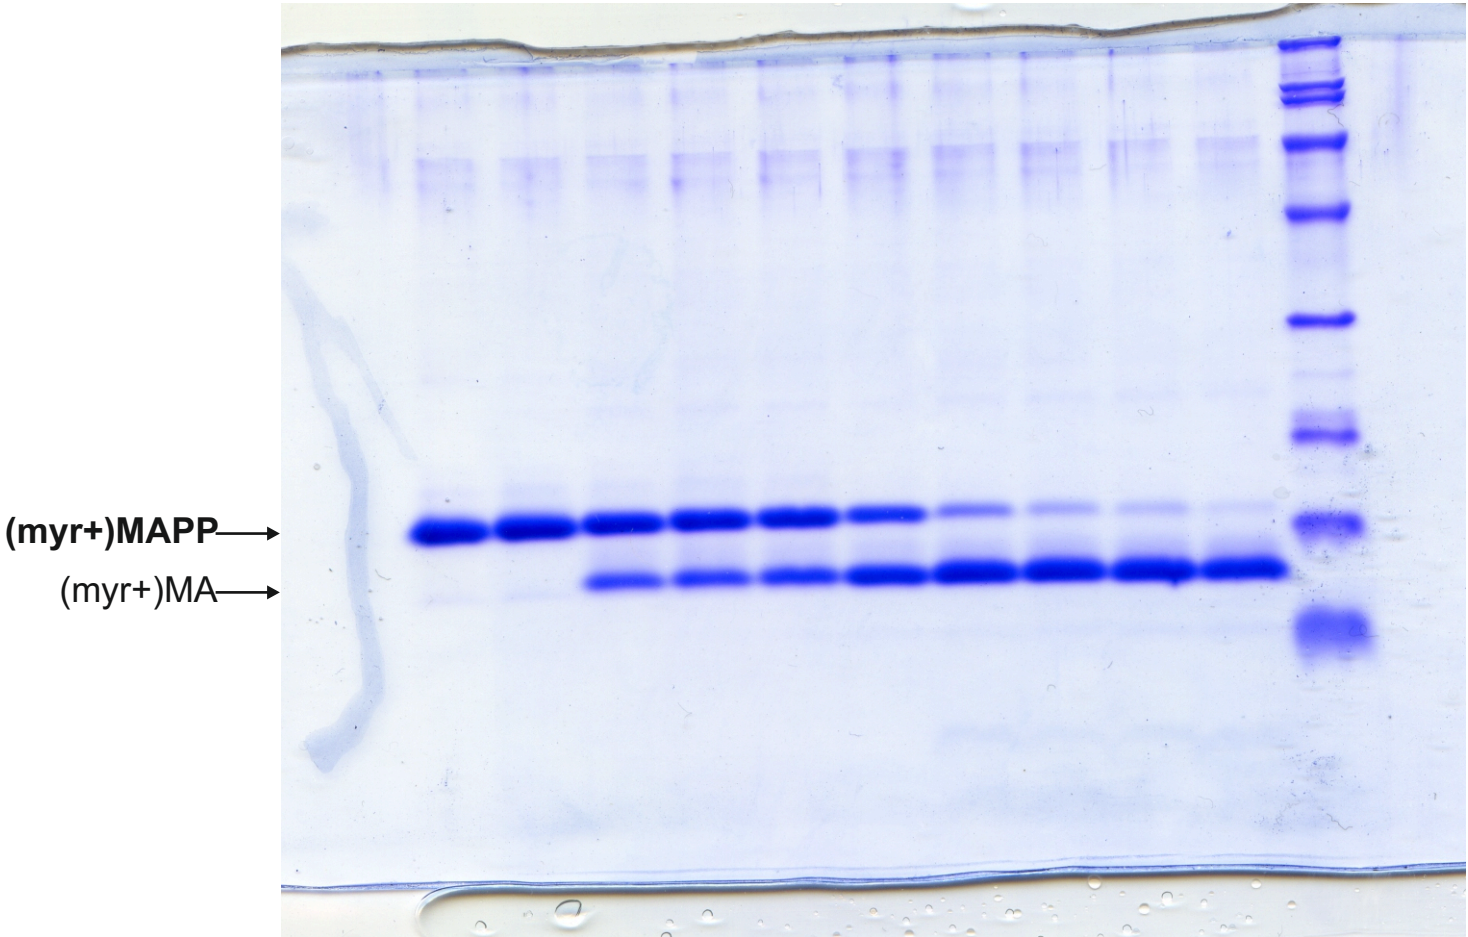

Supplement: supp [file elife-93489-supp-v1.zip]

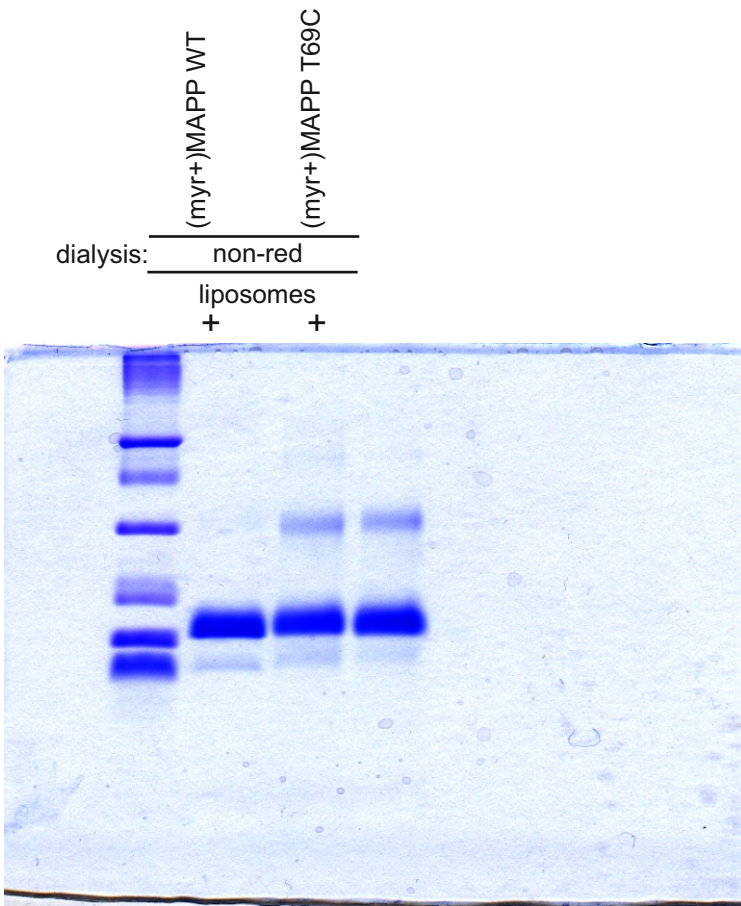

Supplement: supp [file elife-93489-supp-v1.zip]

|                |   |    |   |   |   |    |   |   |   |    |
|----------------|---|----|---|---|---|----|---|---|---|----|
| M-PMV protease | - | -  | + | + | + | +  | + | + | + | +  |
| liposomes      | - | -  | - | - | - | -  | + | + | + | +  |
| time (h)       | 1 | 24 | 1 | 2 | 4 | 24 | 1 | 2 | 4 | 24 |

(myr-)MAPP→

(myr-)MA→

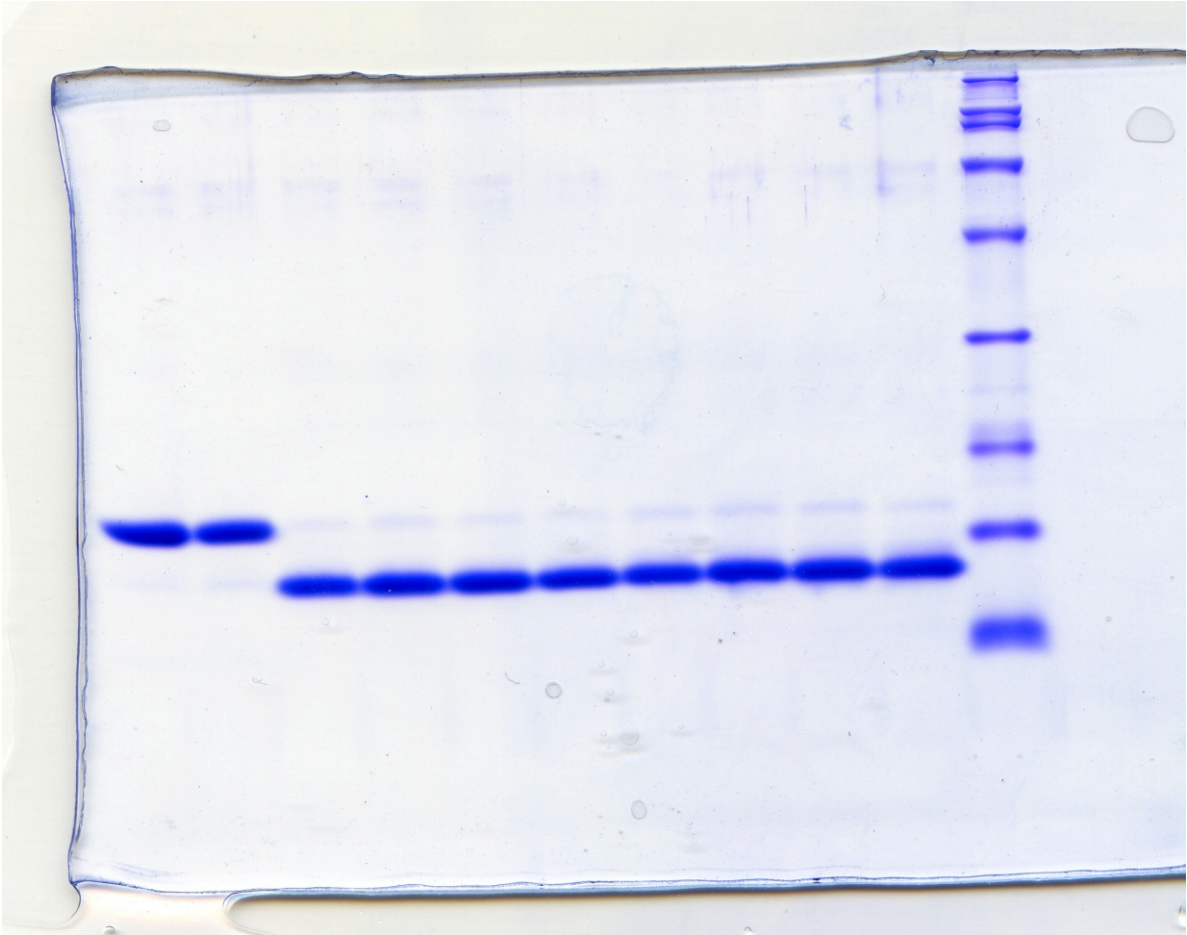

Supplement: supp [file elife-93489-supp-v1.zip]

|           |           |   |           |   |
|-----------|-----------|---|-----------|---|
| dialysis: | non-red   |   | red       |   |
|           | liposomes |   | liposomes |   |
|           | -         | + | -         | + |

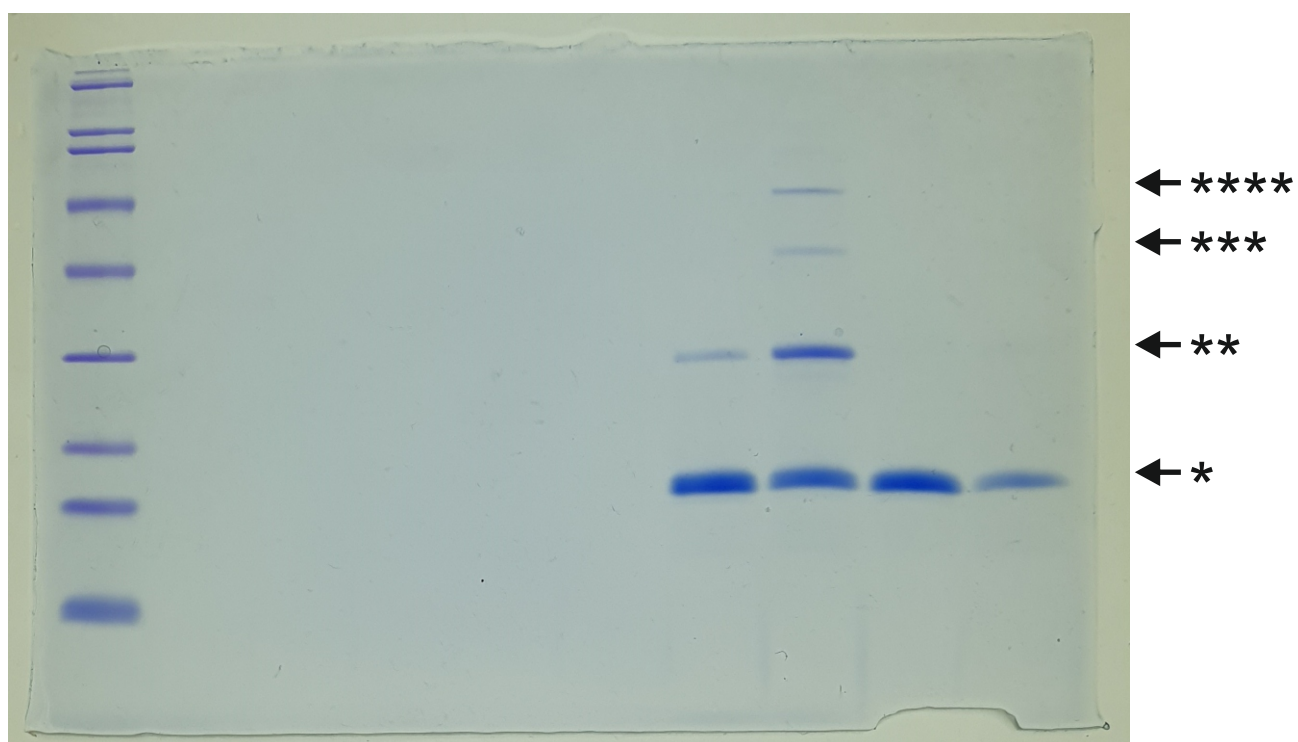

Supplement: supp [file elife-93489-supp-v1.zip]

|                |   |    |   |   |   |    |   |   |   |    |
|----------------|---|----|---|---|---|----|---|---|---|----|
| M-PMV protease | - | -  | + | + | + | +  | + | + | + | +  |
| liposomes      | - | -  | - | - | - | -  | + | + | + | +  |
| time (h)       | 1 | 24 | 1 | 2 | 4 | 24 | 1 | 2 | 4 | 24 |

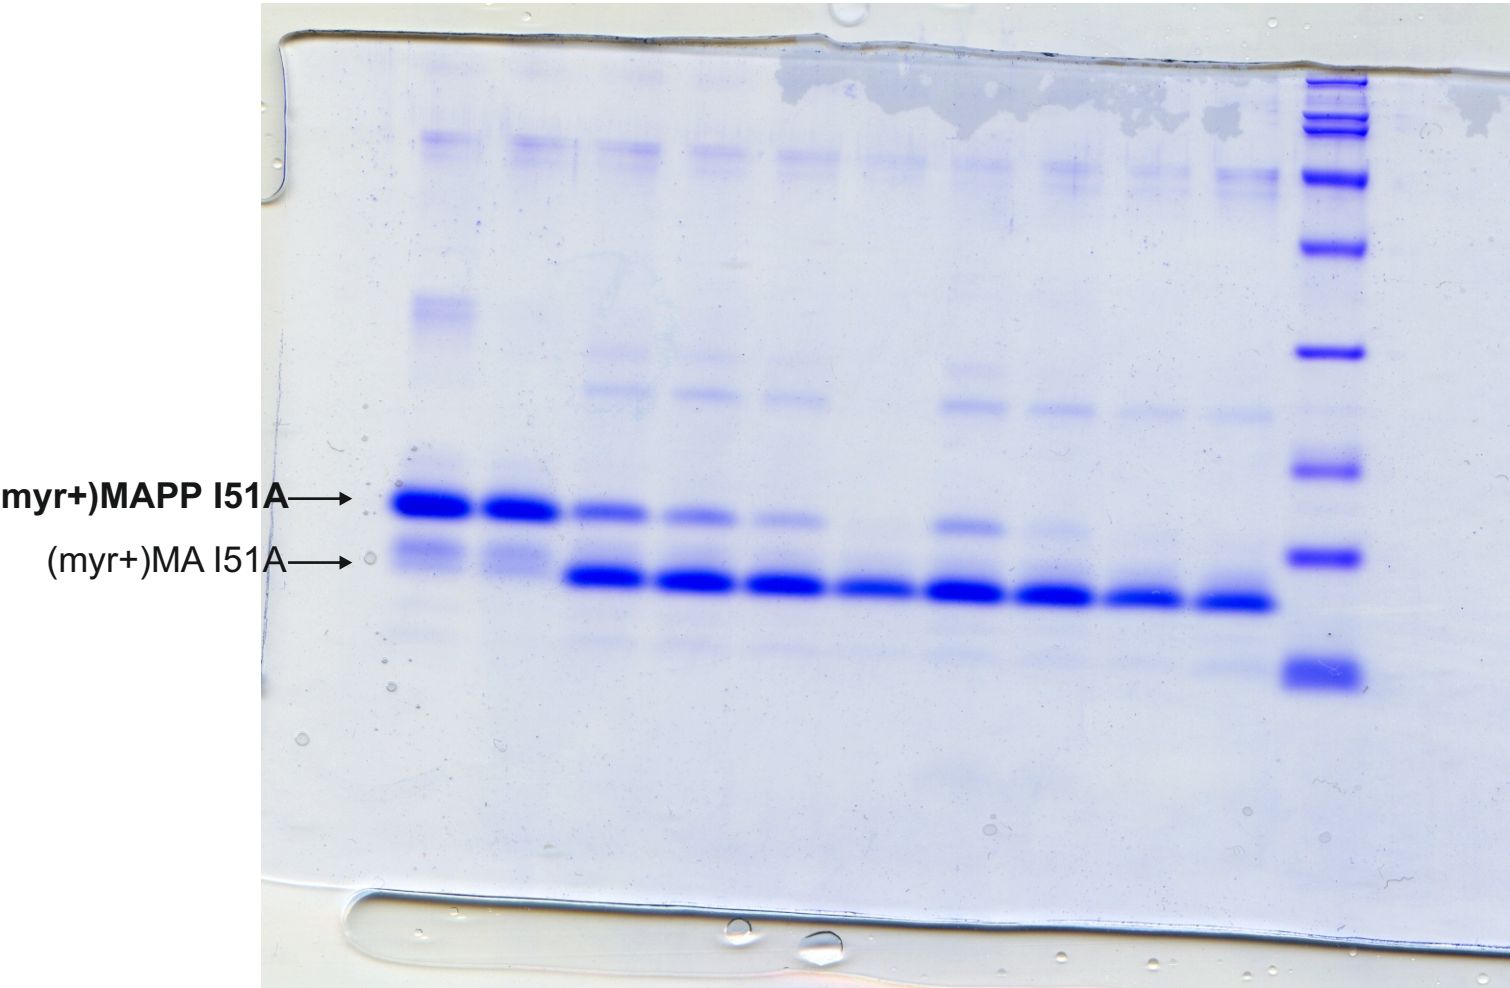

Supplement: supp [file elife-93489-supp-v1.zip]
